# Longitudinal trends and risk factors for depressed mood among Canadian adults during the first wave of COVID-19

**Gustavo S. Betini<sup>1</sup>, John P. Hirdes<sup>1\*</sup>, Rhéda Adekpedjou<sup>2</sup>, Christopher M. Perlman<sup>1</sup>, Nathan Huculak<sup>3</sup>, Paul Hébert<sup>2</sup>**

*<sup>1</sup>School of Public Health and Health Systems, University of Waterloo, Waterloo, ON, Canada*

*<sup>2</sup>Department de Médecine, Université de Montréal et Centre hospitalier de l'Université de Montréal, Montreal, QC, Canada*

*<sup>3</sup>Canadian Red Cross*

\*Corresponding Author: John P. Hirdes, PhD FCAHS, School of Public Health and Health Systems, University of Waterloo, 200 University Avenue West, Waterloo, ON, N2L 3G1; [hirdes@uwaterloo.ca](mailto:hirdes@uwaterloo.ca)

**Funding:** supported by a contribution from the Canadian Red Cross

**Competing Interests:** None

**Tables:** 3

**Figures:** 1

## ABSTRACT

**BACKGROUND:** The COVID-19 pandemic has raised serious concerns about the mental health impact of people directly and indirectly affected by the virus. Because this is a rapidly evolving situation, our goal was to explore potential risk factors and trends in feelings of anxiety and depression among the general population in Canada over the first five months of the pandemic.

**METHODS:** We completed on-line surveys of 3,127 unique individuals representative of the Canadian general population at 4 discreet periods every 6 weeks from April 15<sup>th</sup> to July 28<sup>th</sup> 2020. We assessed feelings of anxiety, depression and loss of interest with the interRAI self-reported mood scale using a multivariable generalized estimating equation model to examine factors associated with having a 5+ score on the scale (indicating potentially depressed mood). We also investigated potential longitudinal trends to examine temporal changes in mood scores.

**RESULTS:** More than 30% of participants felt highly anxious, depressed, and disinterested in everyday activities in the first survey (April), but this number decreased to about 20% over 4 months. Feeling lonely, younger age, feeling overwhelmed by one's health needs, having financial concerns, and living outside of Québec were significantly associated with depressed mood.

**INTERPRETATION:** The prevalence of depressed mood during the pandemic was between 2 and 3 times the pre-pandemic rate (especially among young people), but it can change rapidly in response to social changes. Thus, monitoring of psychological distress among vulnerable groups that may benefit from additional supports should be a priority.

## **INTRODUCTION**

There has been a growing concern that, without focused mitigation efforts, the COVID-19 pandemic has the potential to increase mental health problems worldwide (1–6). In addition to fear of contracting COVID-19, lock-downs, uncertainty, self-isolation and social distancing are disrupting everyday lives, creating personal, social and economic challenges with potential negative psychological effects. This means that the general population can also be adversely affected by mental health consequences of pandemics. International evidence to date clearly suggests that mental health considerations should be taken into account in addition to the physical effects of the virus (7–9,8). For example, quarantine has been reported to cause post-traumatic stress symptoms, confusion, and anger with potentially long lasting effects (7) and depression and anxiety were estimated to be higher among quarantined individuals during the initial stages of COVID-19 in China (8). In addition, risk factors for mental health problems during COVID-19 are reported to include female gender, younger age, presence of chronic and psychiatric illnesses, unemployment, student status, and frequent exposure to social media or news concerning the pandemic (8,14–16,24,25).

Although these studies provide good evidence of the importance of understanding the mental health impact of COVID-19 on the general population, it is still not clear how these negative effects might change with the dynamics of COVID-19 and the changes in the public health policies aiming to contain its spread. This is important because most of these studies were conducted as cross-sectional snapshots at varying time periods of the pandemic, making comparison among studies difficult (8). The objective of this study to examine the mental health impacts of COVID-19 as well as longitudinal changes in the general Canadian population.

## **METHODS**

### **Web-based survey**

We conducted web-based interviews with the general adult population in Canada from April to July in four discrete surveys, 4-6 weeks apart from each other (Table 1). We used a professional polling company to obtain a sample that was representative of the Canadian population (Table 1) when applying survey weights. Participants were recruited via phone (60%), invitation (25%), social media (5%), offline recruitment (5%), partnerships and campaigns (5%). Among the 3,127 participants, ~80% were present in the two or more surveys and 1,510 (66%) were present in all surveys (Table 1). Mental health status was assessed with 3 questions from the interRAI self-reported mood scale, which assesses levels of anxiety, depression, and loss of interest (26). The questions were: “In the last 3 days, how often have you felt: **a.** anxious, restless, or uneasy, **b.** sad, depressed, or hopeless and **c.** little interest or pleasure in things you normally enjoy”. Each item has scores ranging from 0 (not present) to 3 (daily), and scores for the three items are summed to create a scale with a value between 0-9. Higher scores representing more frequent and varied mood symptoms (Cronbach’s alpha=0.81). We set a threshold for having substantially depressed mood at 5 or more based on previous analyses that indicate that was a threshold associated with suicide-related ideation in community mental health populations (results available on request). Socio-demographic variables and main concerns before and during the pandemic (e.g., financial concerns, food insecurity levels and loneliness) were also assessed during the interviews (Table 1, 2).

### **Statistical analysis**

To understand the risk factors associated with the mental health impact of COVID-19, we used a bivariate regression with the percentage of respondents with a 5+ score in the self-reported mood scale as response variable and socio-demographic factors as explanatory variables (Table 1, 2). For simplicity, we only used data from survey 1 for an initial logistic regression model given that the levels of depression, anxiety and loss of interest were stronger at this stage (Figure 1). We then examined a longitudinal interaction between age and survey in a generalized estimating equation model to investigate potential temporal trends in the mental health impact among different age groups. We

focused on age because of the great physical health impact that COVID-19 has on older adults (8,18). We did not find a significant interaction between age and survey wave, therefore we presented the model with main effects only. We weighted all analysis using the survey weights to match the sample to population distributions in the latest Statistics Canada census according to gender, age, region, education, mother tongue, living arrangements, and presence of children in the household. We used data from two general population surveys in the Waterloo Region done in 2011 and 2019 (data available upon request) to compare our results with a base level of the same indicators for the general population before the beginning of the COVID-19 pandemic. The baseline level of scores of 5+ on the self-reported mood scale in those surveys ranged between 6.5% in 2011 and 9.7% in 2019, which is comparable to anxiety (6.33%-50.9%, including mild to severe levels) and depression levels (3.6-7.2%) reported in other studies conducted before the pandemic (22). To provide contextual information, daily COVID-19 cases (Figure 1) were obtained from (27) and figures were produced with the *ggplot2* package in R (28).

## RESULTS

We found that up to 44.3% of the participants had substantial level of depressed mood based on indicators of anxiety, depression and loss of interest in the April survey. Only education and ethnicity were not significant risk factors in the bivariate analysis (Table 2). The final multivariable model indicated that age ( $F_{4,2216} = 7.26, P < 0.001$ ), province ( $F_{1,2219} = 6.14, P = 0.013$ ), feeling overwhelmed by one's health needs ( $F_{1,2219} = 29.56, P = 0.001$ ), loneliness ( $F_{1,2217} = 52.37, P < 0.0001$ ), and financial concerns ( $F_{1,2218} = 7.13, P < 0.001$ ) were significantly associated with depressed mood ( $F_{11,2209} = 56.74, P < 0.001$ ; c-statistics = 0.836). The odds of having a depressed mood were 2.62 times higher in young (18-24) than older adults (65+; 95% confidence interval [CI] 1.58-4.32,  $P < 0.001$ ), 1.64 times higher in people from other provinces compared to Québec (95% CI 1.11-2.43,  $P = 0.013$ ), 3.92 times higher in

people who felt overwhelmed by their health needs (95% CI 2.39-6.41,  $P < 0.001$ ), 16.65 times higher in people who felt lonely daily compared to those that did not feel lonely (95% CI 10.49-26.42,  $P < 0.0001$ ) and 1.93 times higher in people that had financial concerns before and after the pandemic than people without financial concerns (95% CI 1.35-2.77,  $P < 0.001$ ; Table 2, Figure 1). We found a significant temporal trend in the generalized estimating equation model, suggesting a decrease in the odds of depressed mood over time compared with the initial stage of the survey done in April 2020 (Table 3, Figure 1).

## **INTERPRETATION**

Our study provided a longitudinal view of the mental health impact of COVID-19 on about 3,000 participants followed over a 4-month period. The impact was most pronounced on the mental health of younger Canadians and those who reported feeling lonely. In addition, the odds of serious mood disturbance were strongest at the beginning of the pandemic (April), with a rapidly decrease from April to July. However, the absolute levels in July were still 2 times higher compared to the pre-pandemic levels. Although there appears to be potential for resilience and fast recovery in part of the population, the absence of complete recovery could result in even higher levels of anxiety and depression during new waves of the pandemic.

Our results are in line with other studies on the mental health effects of COVID-19, both in the strength of the association and key risk factors (8,11,13,14,23). A meta-analysis found that during the pandemic, prevalence of depression symptoms was 33.7% (95% confidence interval 27.5-40.6) and 31.9% for anxiety (95% CI 27.5-36.7; 16). As in our study, these levels were, in average, higher than the pre-pandemic levels we noted in earlier studies based on our measure (between 6.5 and 9.7%) as well as comparable rates reported by others; (8). Other longitudinal studies have reported a mix of results, with small increases in feelings of depression and decreased anxiety (29) or no trend overall

(30). Our results showed roughly a 30% decrease in the odds of disturbed mood spanned a 4-month period, whereas other longitudinal studies investigated trends over a much shorter time period (29,30). Some of the discrepancies reported in the published literature could be explained by the phase of the pandemic when the study was conducted.

We also observed that young respondents were among the most affected groups, even after controlling for potential confounding factors such as employment status, gender, health, and economic status. This may reflect a true age-group difference in the COVID-19 experience, but it may also reflect generational differences in comfort related to reporting mental health symptoms. Student status and gender have been identified as risk factors in other studies (8), but these were only significant in our bivariate model. Although student status was strongly associated with age, which may explain it not persisting as a predictor of mood disturbance in the multivariable model, it is less clear why gender was not a significant risk factor when we controlled for other sociodemographic variables.

Although the levels of anxiety and depression reported here are in line with the published literature (8,18), COVID-19 happened during a time of changing public sentiment about global political, economic, and climate stability with increased focus on natural disasters like wild fires (e.g., bushfires in Australia and California), and an increase in public protest related to racial equality. Thus, it is unclear from our results whether the pandemic was the primary driver of changes in mood that we observed or it was only one of the many contributors, potentially acting as an amplifier of these other source of stress (31).

We observed clear trends on mental health indicators on a period of 4 months. However, we still do not know what the long-term consequences of COVID-19 will be nor what policies will successfully mitigate its mental health impacts. Information on the long-term impact of past pandemics, such as the Spanish Flu, is scarce. However, some studies reported that people developed psychiatric disorders several years after the 2003 SARS-CoV-1 pandemic (32). Moreover, studies on natural disasters, such as hurricane, fires and earthquake also point to long-term effects where lifetime post-traumatic stress

disorder rates can be up to 40% higher in disaster survivors compared to controls (33,34). Given the substantially elevated levels of distressed mood compared with pre-COVID-19 levels, it is important to monitor whether long-term mental health effects persist in the general population.

## **LIMITATIONS**

Our overall response rate was in the 35% range and the assembled sample was representative of Canadians. In addition, by repeatedly sampling more than 80% of the same individuals over time, we are confident that temporal trends were accurately measured. Despite this, vulnerable groups may not have been well represented. For instance, older socially isolated adults, persons in facility-based settings (e.g., long-term care), and other marginalized groups may not have internet access or may not be able to participate because of other barriers (35–37). In addition, depressive symptoms tend to decrease with age (38,39). Thus, the absolute values of our mental health indicators might be biased, specifically among older adults (65+), despite the fact that socio-demographic factors were weighted in the statistical analysis. Fortunately, non-response to surveys does not substantially harm the ability to estimate associations among variables including to investigate temporal trends (35). Another limitation in our web-survey approach is the limited subsample sizes of minority groups who may be differentially affected by mental health concerns. Future efforts to examine the impact of COVID-19 on race and ethnicity should over-sample minority groups to allow for adequate subsample sizes.

## **CONCLUSIONS**

In our survey, we showed that the pandemic increased feelings of anxiety, depression, and loss of interest symptoms 2 to 3-fold, especially in young people. We also documented that these changes can rapidly decrease in a short period of time, likely related to external social trends such as implementation of broad social policies related to epidemic control, communications from media, health experts, and political leadership. Future studies should focus not only on the description of the mental health consequences, but also in establishing evidence of possible causal relationships between



the dynamic of the disease, public health policies and mental health indicators. For example, it would be important to tease apart the effects of fear of disease, subjective and objective aspects of social isolation, economic uncertainty, other challenges to mental health.

## ACKNOWLEDGEMENTS

We thank Wendy Hepburn, Mary Bartram, and Raquel Betini for comments on early versions of this manuscript. This project was funded by the Canadian Red Cross and survey conducted by Leger. The Canadian Red Cross provided all data to the investigative team without constraints.

Disclaimer: Dr. Paul Hébert and Nathan Huculak are employed by the Canadian Red Cross. Opinions expressed herein are solely those of the investigators. They do not necessarily reflect views or positions held by the Canadian Red Cross.

**Authors Contribution:** JPH, CMP, NH, and PH designed the study; JPH and RA analyzed the data; GSB wrote the first draft of the manuscript. All authors discussed the ideas and commented on subsequent drafts of the manuscript.

## REFERENCES

1. Xiang Y-T, Yang Y, Li W, Zhang L, Zhang Q, Cheung T, et al. Timely mental health care for the 2019 novel coronavirus outbreak is urgently needed. *Lancet Psychiatry* [Internet]. 2020 Mar 1 [cited 2020 Apr 6];7(3):228–9. Available from: [https://www.thelancet.com/journals/lanpsy/article/PIIS2215-0366\(20\)30046-8/abstract](https://www.thelancet.com/journals/lanpsy/article/PIIS2215-0366(20)30046-8/abstract)
2. Liu S, Yang L, Zhang C, Xiang Y-T, Liu Z, Hu S, et al. Online mental health services in China during the COVID-19 outbreak. *Lancet Psychiatry* [Internet]. 2020 Apr 1 [cited 2020 Apr 6];7(4):e17–8. Available from: [https://www.thelancet.com/journals/lanpsy/article/PIIS2215-0366\(20\)30077-8/abstract](https://www.thelancet.com/journals/lanpsy/article/PIIS2215-0366(20)30077-8/abstract)
3. Galea S, Merchant RM, Lurie N. The Mental Health Consequences of COVID-19 and Physical Distancing: The Need for Prevention and Early Intervention. *JAMA Intern Med* [Internet]. 2020

Apr 10 [cited 2020 Apr 12]; Available from:

<https://jamanetwork.com/journals/jamainternalmedicine/fullarticle/2764404>

4. Zhu S, Wu Y, Zhu C, Hong W, Yu Z, Chen Z, et al. The immediate mental health impacts of the COVID-19 pandemic among people with or without quarantine managements. *Brain Behav Immun* [Internet]. 2020 Apr 18 [cited 2020 May 1]; Available from: <https://www.ncbi.nlm.nih.gov/pmc/articles/PMC7165285/>
5. Rajkumar RP. COVID-19 and mental health: A review of the existing literature. *Asian J Psychiatry* [Internet]. 2020 Aug 1 [cited 2020 May 1];52:102066. Available from: <http://www.sciencedirect.com/science/article/pii/S1876201820301775>
6. Pfefferbaum B, North CS. Mental Health and the Covid-19 Pandemic. *N Engl J Med* [Internet]. 2020 Aug 6 [cited 2020 Sep 30];383(6):510–2. Available from: <https://doi.org/10.1056/NEJMp2008017>
7. Brooks SK, Webster RK, Smith LE, Woodland L, Wessely S, Greenberg N, et al. The psychological impact of quarantine and how to reduce it: rapid review of the evidence. *The Lancet* [Internet]. 2020 Mar 14 [cited 2020 Apr 7];395(10227):912–20. Available from: <http://www.sciencedirect.com/science/article/pii/S0140673620304608>
8. Xiong J, Lipsitz O, Nasri F, Lui LMW, Gill H, Phan L, et al. Impact of COVID-19 pandemic on mental health in the general population: A systematic review. *J Affect Disord* [Internet]. 2020 Dec 1 [cited 2020 Oct 1];277:55–64. Available from: <http://www.sciencedirect.com/science/article/pii/S0165032720325891>
9. Serafini G, Parmigiani B, Amerio A, Aguglia A, Sher L, Amore M. The psychological impact of COVID-19 on the mental health in the general population. *QJM Int J Med* [Internet]. 2020 Aug 1 [cited 2020 Oct 3];113(8):531–7. Available from: <https://academic.oup.com/qjmed/article/113/8/531/5860841>
10. Lei L, Huang X, Zhang S, Yang J, Yang L, Xu M. Comparison of Prevalence and Associated Factors of Anxiety and Depression Among People Affected by versus People Unaffected by Quarantine During the COVID-19 Epidemic in Southwestern China. *Med Sci Monit* [Internet]. 2020 Apr 26 [cited 2020 May 1];26. Available from: <https://www.medscimonit.com/abstract/index/idArt/924609>
11. Fitzpatrick KM, Harris C, Drawve G. Fear of COVID-19 and the mental health consequences in America. *Psychol Trauma Theory Res Pract Policy*. 2020;
12. Fitzpatrick KM, Drawve G, Harris C. Facing new fears during the COVID-19 pandemic: The State of America’s mental health. *J Anxiety Disord* [Internet]. 2020 Oct 1 [cited 2020 Oct 1];75:102291. Available from: <http://www.sciencedirect.com/science/article/pii/S0887618520301055>
13. Galindo-Vázquez O, Ramírez-Orozco M, Costas-Muñiz R, Mendoza-Contreras LA, Calderillo-Ruiz G, Meneses-García A. Symptoms of anxiety, depression and self-care behaviors during the COVID-19 pandemic in the general population. *Gac Med Mex*. 2020;156(4):298–305.

14. Wang C, Pan R, Wan X, Tan Y, Xu L, Ho CS, et al. Immediate Psychological Responses and Associated Factors during the Initial Stage of the 2019 Coronavirus Disease (COVID-19) Epidemic among the General Population in China. *Int J Environ Res Public Health* [Internet]. 2020 Jan [cited 2020 Apr 8];17(5):1729. Available from: <https://www.mdpi.com/1660-4601/17/5/1729>
15. Qiu J, Shen B, Zhao M, Wang Z, Xie B, Xu Y. A nationwide survey of psychological distress among Chinese people in the COVID-19 epidemic: implications and policy recommendations. *Gen Psychiatry* [Internet]. 2020 Mar 6 [cited 2020 Apr 8];33(2). Available from: <https://www.ncbi.nlm.nih.gov/pmc/articles/PMC7061893/>
16. Moccia L, Janiri D, Pepe M, Dattoli L, Molinaro M, De Martin V, et al. Affective temperament, attachment style, and the psychological impact of the COVID-19 outbreak: an early report on the Italian general population. *Brain Behav Immun* [Internet]. 2020 Apr 20 [cited 2020 Apr 24]; Available from: <http://www.sciencedirect.com/science/article/pii/S0889159120305869>
17. Knipe D, Evans H, Marchant A, Gunnell D, John A. Mapping population mental health concerns related to COVID-19 and the consequences of physical distancing: a Google trends analysis. *Wellcome Open Res* [Internet]. 2020 Apr 30 [cited 2020 May 6];5:82. Available from: <https://wellcomeopenresearch.org/articles/5-82/v1>
18. Salari N, Hosseini-Far A, Jalali R, Vaisi-Raygani A, Rasoulpoor S, Mohammadi M, et al. Prevalence of stress, anxiety, depression among the general population during the COVID-19 pandemic: a systematic review and meta-analysis. *Glob Health* [Internet]. 2020 Jul 6 [cited 2020 Aug 18];16(1):57. Available from: <https://doi.org/10.1186/s12992-020-00589-w>
19. Bendau A, Petzold MB, Pyrkosch L, Mascarell Maricic L, Betzler F, Rogoll J, et al. Associations between COVID-19 related media consumption and symptoms of anxiety, depression and COVID-19 related fear in the general population in Germany. *Eur Arch Psychiatry Clin Neurosci* [Internet]. 2020 Jul 20 [cited 2020 Sep 30]; Available from: <https://doi.org/10.1007/s00406-020-01171-6>
20. Rossi R, Socci V, Talevi D, Mensi S, Niolu C, Pacitti F, et al. COVID-19 Pandemic and Lockdown Measures Impact on Mental Health Among the General Population in Italy. *Front Psychiatry* [Internet]. 2020 Aug 7 [cited 2020 Sep 30];11. Available from: <https://www.ncbi.nlm.nih.gov/pmc/articles/PMC7426501/>
21. Šljivo A, Kačamaković M, Quraishi I, Džubur Kulenović A. Fear and depression among residents of Bosnia and Herzegovina during COVID-19 outbreak-Internet survey. *Psychiatr Danub* [Internet]. 2020 Aug 13 [cited 2020 Sep 30];32(2):266–72. Available from: [https://hrcak.srce.hr/index.php?show=clanak&id\\_clanak\\_jezik=352049](https://hrcak.srce.hr/index.php?show=clanak&id_clanak_jezik=352049)
22. Groarke JM, Berry E, Graham-Wisener L, McKenna-Plumley PE, McGlinchey E, Armour C. Loneliness in the UK during the COVID-19 pandemic: Cross-sectional results from the COVID-19 Psychological Wellbeing Study. *PLOS ONE* [Internet]. 2020 Sep 24 [cited 2020 Oct 1];15(9):e0239698. Available from: <https://journals.plos.org/plosone/article?id=10.1371/journal.pone.0239698>
23. Fullana MA, Hidalgo-Mazzei D, Vieta E, Radua J. Coping behaviors associated with decreased anxiety and depressive symptoms during the COVID-19 pandemic and lockdown. *J Affect Disord*

[Internet]. 2020 Oct 1 [cited 2020 Sep 30];275:80–1. Available from: <http://www.sciencedirect.com/science/article/pii/S0165032720323855>

24. Kikuchi H, Machida M, Nakamura I, Saito R, Odagiri Y, Kojima T, et al. Changes in Psychological Distress during the COVID-19 Pandemic in Japan: a Longitudinal Study. *J Epidemiol*. 2020;advpub.
25. Solomou I, Constantinidou F. Prevalence and Predictors of Anxiety and Depression Symptoms during the COVID-19 Pandemic and Compliance with Precautionary Measures: Age and Sex Matter. *Int J Environ Res Public Health* [Internet]. 2020 Jan [cited 2020 Sep 30];17(14):4924. Available from: <https://www.mdpi.com/1660-4601/17/14/4924>
26. Hirdes JP, van Everdingen C, Ferris J, Franco-Martin M, Fries BE, Heikkilä J, et al. The interRAI Suite of Mental Health Assessment Instruments: An Integrated System for the Continuum of Care. *Front Psychiatry* [Internet]. 2020 [cited 2020 Oct 8];10. Available from: [https://www.frontiersin.org/articles/10.3389/fpsy.2019.00926/full?utm\\_source=F-NTF&utm\\_medium=EMLX&utm\\_campaign=PRD\\_FEOPS\\_20170000\\_ARTICLE](https://www.frontiersin.org/articles/10.3389/fpsy.2019.00926/full?utm_source=F-NTF&utm_medium=EMLX&utm_campaign=PRD_FEOPS_20170000_ARTICLE)
27. Berry I, Soucy J-PR, Tuite A, Fisman D. Open access epidemiologic data and an interactive dashboard to monitor the COVID-19 outbreak in Canada. *CMAJ* [Internet]. 2020 Apr 14 [cited 2020 Nov 11];192(15):E420–E420. Available from: <https://www.cmaj.ca/content/192/15/E420>
28. Wickham H. *ggplot2: Elegant Graphics for Data Analysis*. Springer; 2016. 266 p.
29. Canet-Juric L, Andrés ML, del Valle M, López-Morales H, Poó F, Galli JI, et al. A Longitudinal Study on the Emotional Impact Cause by the COVID-19 Pandemic Quarantine on General Population. *Front Psychol* [Internet]. 2020 [cited 2020 Oct 31];11. Available from: <https://www.frontiersin.org/articles/10.3389/fpsyg.2020.565688/full>
30. Wang C, Pan R, Wan X, Tan Y, Xu L, McIntyre RS, et al. A longitudinal study on the mental health of general population during the COVID-19 epidemic in China. *Brain Behav Immun* [Internet]. 2020 Apr 13 [cited 2020 Apr 17]; Available from: <http://www.sciencedirect.com/science/article/pii/S0889159120305110>
31. Phillips CA, Caldas A, Cleetus R, Dahl KA, Declet-Barreto J, Licker R, et al. Compound climate risks in the COVID-19 pandemic. *Nat Clim Change* [Internet]. 2020 Jul [cited 2020 Nov 4];10(7):586–8. Available from: <https://www.nature.com/articles/s41558-020-0804-2>
32. Tzeng N-S, Chung C-H, Chang C-C, Chang H-A, Kao Y-C, Chang S-Y, et al. What could we learn from SARS when facing the mental health issues related to the COVID-19 outbreak? A nationwide cohort study in Taiwan. *Transl Psychiatry* [Internet]. 2020 Oct 6 [cited 2020 Nov 10];10(1):1–9. Available from: <https://www.nature.com/articles/s41398-020-01021-y>
33. McFarlane AC, Hooff MV. Impact of childhood exposure to a natural disaster on adult mental health: 20-year longitudinal follow-up study. *Br J Psychiatry* [Internet]. 2009 Aug [cited 2020 Nov 10];195(2):142–8. Available from: <https://www.cambridge.org/core/journals/the-british-journal-of-psychiatry/article/impact-of-childhood-exposure-to-a-natural-disaster-on-adult-mental-health-20year-longitudinal-followup-study/7388BC506A7F8465B35941EAF5F8C95E>

34. Alexandra I. T. van Solm P, John P. Hirdes P, Leslie A. Eckel P, George A. Heckman MD, Philip L. Bigelow P. Using standard clinical assessments for home care to identify vulnerable populations before, during, and after disasters. *J Emerg Manag* [Internet]. 2017 Nov 1 [cited 2020 Nov 4];15(6):355–66. Available from: <https://www.wmpllc.org/ojs/index.php/jem/article/view/824>
35. Thompson ME, Forbes WF. The problem of low response rates in surveys of the elderly. *Math Sci*. 1989;14:127–37.
36. Jobe JB, Mingay DJ. Cognitive laboratory approach to designing questionnaires for surveys of the elderly. *Public Health Rep* [Internet]. 1990 [cited 2020 Oct 31];105(5):518–24. Available from: <https://www.ncbi.nlm.nih.gov/pmc/articles/PMC1580104/>
37. Thorslund M, Wärneryd B. Surveying the elderly about health, medical care and living conditions. Some issues of response inconsistency. *Arch Gerontol Geriatr* [Internet]. 1990 Sep 1 [cited 2020 Oct 31];11(2):161–73. Available from: <http://www.sciencedirect.com/science/article/pii/016749439090009U>
38. Lawton MP. Emotion in Later Life. *Curr Dir Psychol Sci* [Internet]. 2001 Aug 1 [cited 2020 Nov 9];10(4):120–3. Available from: <https://doi.org/10.1111/1467-8721.00130>
39. Wight RG, Sepúlveda JE, Aneshensel CS. Depressive symptoms: how do adolescents compare with adults? *J Adolesc Health* [Internet]. 2004 Apr 1 [cited 2020 Nov 9];34(4):314–23. Available from: <http://www.sciencedirect.com/science/article/pii/S1054139X03002751>

## TABLES

**Table 1.** Profile of the participants in each survey. Number between parenthesis on the sample size column represents new participants added to the survey.

|                                      | APRIL 15 <sup>TH</sup> TO 20 <sup>TH</sup> | MAY 6 <sup>TH</sup> TO 13 <sup>TH</sup> | JUNE 3 <sup>RD</sup> TO 9 <sup>TH</sup> | JULY 22 <sup>TH</sup> TO 28 <sup>TH</sup> |
|--------------------------------------|--------------------------------------------|-----------------------------------------|-----------------------------------------|-------------------------------------------|
| <b>N</b>                             | 2,200                                      | 2,264 (314)                             | 2,280 (352)                             | 2,201 (241)                               |
| <b>RECONTACTS IN PREVIOUS SURVEY</b> | na                                         | 86%                                     | 84%                                     | 87%                                       |
| <b>GENDER</b>                        |                                            |                                         |                                         |                                           |
| Male                                 | 48%                                        | 48%                                     | 49%                                     | 49%                                       |
| Female                               | 52%                                        | 52%                                     | 51%                                     | 51%                                       |
| <b>AGE</b>                           |                                            |                                         |                                         |                                           |
| 18-34                                | 27%                                        | 27%                                     | 26%                                     | 24%                                       |
| 35-54                                | 34%                                        | 34%                                     | 36%                                     | 37%                                       |
| 55-64                                | 17%                                        | 17%                                     | 17%                                     | 17%                                       |
| 65-74                                | 12%                                        | 12%                                     | 12%                                     | 12%                                       |
| 75+                                  | 9%                                         | 9%                                      | 9%                                      | 9%                                        |
| <b>PROVINCE</b>                      |                                            |                                         |                                         |                                           |
| British Columbia                     | 14%                                        | 14%                                     | 14%                                     | 14%                                       |
| Alberta                              | 11%                                        | 11%                                     | 11%                                     | 11%                                       |
| Manitoba/Saskatchewan                | 6%                                         | 6%                                      | 7%                                      | 7%                                        |
| Ontario                              | 38%                                        | 38%                                     | 38%                                     | 38%                                       |
| Quebec                               | 23%                                        | 23%                                     | 23%                                     | 23%                                       |
| Atlantic                             | 7%                                         | 7%                                      | 7%                                      | 7%                                        |
| <b>REGION</b>                        |                                            |                                         |                                         |                                           |
| Quebec                               | 23%                                        | 23%                                     | 23%                                     | 23%                                       |
| Rest of Canada                       | 77%                                        | 77%                                     | 77%                                     | 77%                                       |
| <b>AREA TYPE</b>                     |                                            |                                         |                                         |                                           |
| Urban                                | 88%                                        | 89%                                     | 90%                                     | 90%                                       |
| Rural                                | 12%                                        | 11%                                     | 10%                                     | 10%                                       |
| <b>MOTHER TONGUE</b>                 |                                            |                                         |                                         |                                           |
| French                               | 21%                                        | 20%                                     | 20%                                     | 20%                                       |
| English                              | 67%                                        | 66%                                     | 66%                                     | 65%                                       |
| Other languages                      | 12%                                        | 13%                                     | 14%                                     | 14%                                       |
| <b>ETHNIC ORIGIN</b>                 |                                            |                                         |                                         |                                           |
| Caucasian (White)                    | 83%                                        | 81%                                     | 81%                                     | 80%                                       |
| Aboriginal / First Nations           | 1%                                         | 1%                                      | 1%                                      | 1%                                        |
| Black                                | 2%                                         | 2%                                      | 2%                                      | 2%                                        |
| Chinese                              | 3%                                         | 5%                                      | 5%                                      | 5%                                        |
| Other                                | 9%                                         | 10%                                     | 10%                                     | 10%                                       |
| <b>CHILDREN IN THE HOUSEHOLD</b>     |                                            |                                         |                                         |                                           |

|                                       | APRIL 15 <sup>TH</sup> TO 20 <sup>TH</sup> | MAY 6 <sup>TH</sup> TO 13 <sup>TH</sup> | JUNE 3 <sup>RD</sup> TO 9 <sup>TH</sup> | JULY 22 <sup>TH</sup> TO 28 <sup>TH</sup> |
|---------------------------------------|--------------------------------------------|-----------------------------------------|-----------------------------------------|-------------------------------------------|
| Yes                                   | 28%                                        | 28%                                     | 28%                                     | 28%                                       |
| No                                    | 72%                                        | 72%                                     | 72%                                     | 72%                                       |
| <b>LIVING SITUATION</b>               |                                            |                                         |                                         |                                           |
| Alone                                 | 20%                                        | 20%                                     | 21%                                     | 21%                                       |
| With spouse (partner only)            | 32%                                        | 31%                                     | 32%                                     | 32%                                       |
| With spouse / partner and other(s)    | 27%                                        | 27%                                     | 26%                                     | 26%                                       |
| With child(ren) (no spouse / partner) | 5%                                         | 5%                                      | 6%                                      | 6%                                        |
| With parent(s) or guardian(s)         | 9%                                         | 11%                                     | 10%                                     | 10%                                       |
| With sibling(s)                       | 1%                                         | 1%                                      | 1%                                      | 1%                                        |
| With other relative(s)                | 2%                                         | 2%                                      | 2%                                      | 2%                                        |
| With nonrelative(s)                   | 3%                                         | 3%                                      | 3%                                      | 3%                                        |
| <b>VULNERABLE SENIOR</b>              |                                            |                                         |                                         |                                           |
| Yes                                   | na                                         | 2%                                      | 2%                                      | 2%                                        |
| No                                    | na                                         | 98%                                     | 98%                                     | 98%                                       |
| <b>EDUCATION</b>                      |                                            |                                         |                                         |                                           |
| Elementary/High School                | 33%                                        | 31%                                     | 32%                                     | 30%                                       |
| College                               | 40%                                        | 41%                                     | 41%                                     | 43%                                       |
| University                            | 27%                                        | 27%                                     | 27%                                     | 27%                                       |
| <b>OCCUPATION</b>                     |                                            |                                         |                                         |                                           |
| Office / services / sales             | na                                         | 23%                                     | 22%                                     | 23%                                       |
| Manual Worker                         | 11%                                        | 10%                                     | 10%                                     | 9%                                        |
| Professional                          | 19%                                        | 19%                                     | 20%                                     | 20%                                       |
| Homemaker                             | 3%                                         | 4%                                      | 4%                                      | 4%                                        |
| Student                               | 7%                                         | 7%                                      | 7%                                      | 6%                                        |
| Retired                               | 27%                                        | 27%                                     | 28%                                     | 28%                                       |
| Unemployed                            | 5%                                         | 5%                                      | 5%                                      | 4%                                        |
| <b>HOUSEHOLD INCOME</b>               |                                            |                                         |                                         |                                           |
| Less than \$40K                       | 23%                                        | 21%                                     | 22%                                     | 22%                                       |
| \$40K - \$59K                         | 17%                                        | 18%                                     | 17%                                     | 15%                                       |
| \$60K - \$79K                         | 15%                                        | 16%                                     | 16%                                     | 15%                                       |
| \$80K - \$99K                         | 13%                                        | 13%                                     | 14%                                     | 15%                                       |
| \$100K - \$149K                       | 15%                                        | 15%                                     | 16%                                     | 15%                                       |
| > \$150K                              | 7%                                         | 7%                                      | 8%                                      | 8%                                        |

**Table 2.** Unadjusted and adjusted odds ratios, 95% confidence interval and P-value for score of 5+ on self-reported mood scale in survey 1 (April 10<sup>th</sup>-15<sup>th</sup>).

|                                      | Bivariate analysis<br>Unadjusted OR |               |                   | Multivariable analysis<br>Adjusted OR |              |                   |
|--------------------------------------|-------------------------------------|---------------|-------------------|---------------------------------------|--------------|-------------------|
|                                      | OR                                  | 95% CI        | P-value           | OR                                    | 95% CI       | P-value           |
| <b>Age (years)</b>                   |                                     |               | <b>&lt; 0.001</b> |                                       |              | <b>&lt; 0.001</b> |
| 18-24 vs ≥ 65                        | 5.61                                | 3.43 to 9.17  | < 0.001           | 2.62                                  | 1.58 to 4.32 | < 0.001           |
| 25-34 vs ≥ 65                        | 3.52                                | 2.37 to 5.22  | < 0.001           | 1.96                                  | 1.21 to 3.17 | 0.006             |
| 35-44 vs ≥ 65                        | 3.39                                | 2.28 to 5.03  | < 0.001           | 2.67                                  | 1.73 to 4.14 | < 0.001           |
| 45-64 vs ≥ 65                        | 2.31                                | 1.69 to 3.15  | < 0.001           | 1.88                                  | 1.30 to 2.72 | < 0.001           |
| <b>Gender</b>                        |                                     |               | <b>0.004</b>      |                                       |              |                   |
| Female vs Male                       | 1.49                                | 1.13 to 1.95  | 0.004             |                                       |              |                   |
| <b>Province</b>                      |                                     |               | <b>&lt; 0.001</b> |                                       |              | <b>0.01</b>       |
| Others vs Quebec                     | 2.1                                 | 1.49 to 2.94  |                   | 1.64                                  | 1.11 to 2.43 |                   |
| <b>Language</b>                      |                                     |               | <b>&lt; 0.001</b> |                                       |              |                   |
| English vs French                    | 1.89                                | 1.33 to 2.69  | < 0.001           |                                       |              |                   |
| Bilingual vs French                  | 3.21                                | 1.59 to 6.47  | 0.001             |                                       |              |                   |
| Others vs French                     | 1.90                                | 1.08 to 3.35  | 0.03              |                                       |              |                   |
| <b>Education</b>                     |                                     |               | 0.70              |                                       |              |                   |
| College vs Elementary/High school    | 0.94                                | 0.66 to 1.33  | 0.73              |                                       |              |                   |
| University vs Elementary/High school | 1.07                                | 0.77 to 1.47  | 0.69              |                                       |              |                   |
| <b>Living with</b>                   |                                     |               | <b>&lt; 0.001</b> |                                       |              |                   |
| Spouse/partner vs Alone              | 0.75                                | 0.52 to 1.08  | 0.12              |                                       |              |                   |
| Parent/guardian vs Alone             | 1.99                                | 1.16 to 3.40  | 0.01              |                                       |              |                   |
| Other relatives vs Alone             | 1.23                                | 0.86 to 1.76  | 0.25              |                                       |              |                   |
| Non relatives vs Alone               | 2.16                                | 0.98 to 4.77  | 0.06              |                                       |              |                   |
| <b>Occupation</b>                    |                                     |               | <b>&lt; 0.001</b> |                                       |              |                   |
| Homemade vs Manual worker            | 0.94                                | 0.41 to 2.12  | 0.88              |                                       |              |                   |
| No answer vs Manual worker           | 5.33                                | 1.46 to 19.49 | 0.01              |                                       |              |                   |
| Retired vs Manual worker             | 0.43                                | 0.32 to 0.57  | <0.001            |                                       |              |                   |
| Student vs Manual worker             | 1.78                                | 1.04 to 3.04  | 0.04              |                                       |              |                   |
| Unemployed vs Manual worker          | 1.31                                | 0.69 to 2.49  | 0.42              |                                       |              |                   |
| <b>Income</b>                        |                                     |               | <b>&lt; 0.001</b> |                                       |              |                   |
| < \$40,000 vs ≥ \$150,000            | 1.39                                | 0.76 to 2.54  | 0.28              |                                       |              |                   |
| \$40,000 - \$59,999 vs ≥ \$150,000   | 1.08                                | 0.58 to 2.00  | 0.80              |                                       |              |                   |
| \$60,000 - \$79,999 vs ≥ \$150,000   | 1.57                                | 0.83 to 2.97  | 0.16              |                                       |              |                   |
| \$80,000 - \$99,999 vs ≥ \$150,000   | 1.35                                | 0.70 to 2.58  | 0.36              |                                       |              |                   |
| \$100,000 - \$149,999 vs ≥ \$150,000 | 0.83                                | 0.43 to 1.60  | 0.59              |                                       |              |                   |
| No answer vs ≥ \$150,000             | 0.89                                | 0.44 to 1.81  | 0.75              |                                       |              |                   |
| <b>Ethnicity</b>                     |                                     |               | 0.07              |                                       |              |                   |
| Caucasian vs Other                   | 1.01                                | 0.69 to 1.48  | 0.94              |                                       |              |                   |
| No answer vs Other                   | 3.49                                | 1.17 to 10.43 | 0.03              |                                       |              |                   |
| <b>Health before Covid19</b>         |                                     |               | <b>&lt; 0.001</b> |                                       |              |                   |
| Fair vs Excellent/good               | 1.93                                | 1.35 to 2.80  | 0.003             |                                       |              |                   |



|                                                    | Bivariate analysis<br>Unadjusted OR |                |                   | Multivariable analysis<br>Adjusted OR |                |                   |
|----------------------------------------------------|-------------------------------------|----------------|-------------------|---------------------------------------|----------------|-------------------|
|                                                    | OR                                  | 95% CI         | P-value           | OR                                    | 95% CI         | P-value           |
| Poor vs Excellent/good                             | 3.81                                | 1.57 to 9.26   | < 0.001           |                                       |                |                   |
| <b>Health in the past month</b>                    |                                     |                | <b>&lt; 0.001</b> |                                       |                |                   |
| Fair vs Excellent/good                             | 2.73                                | 1.98 to 7.36   | < 0.001           |                                       |                |                   |
| Poor vs Excellent/good                             | 6.15                                | 3.01 to 12.52  | < 0.001           |                                       |                |                   |
| <b>Family overwhelmed by one's health needs</b>    |                                     |                |                   |                                       |                | < 0.001           |
| Yes vs No                                          | 4.87                                | 3.13 to 7.56   | <.001             | 3.92                                  | 2.39 to 6.41   |                   |
| <b>Feel lonely</b>                                 |                                     |                | <b>&lt; 0.001</b> |                                       |                | <b>&lt; 0.001</b> |
| Only in specific situations / I do not feel lonely | 2.84                                | 1.75 to 4.62   | <b>&lt; 0.001</b> | 2.20                                  | 1.31 to 3.70   | 0.003             |
| Occasionally / I do not feel lonely                | 4.74                                | 3.1 to 7.22    | <b>&lt; 0.001</b> | 3.80                                  | 2.45 to 5.91   | < 0.001           |
| Daily / I do not feel lonely                       | 21.31                               | 13.66 to 33.26 | <b>&lt; 0.001</b> | 16.65                                 | 10.49 to 26.42 | < 0.001           |
| <b>Worried about ends meet now</b>                 |                                     |                | <b>&lt; 0.001</b> |                                       |                |                   |
| Before and after COVID-19 vs None                  | 3.37                                | 2.45 to 4.64   | < 0.001           | 1.93                                  | 1.35 to 2.77   | 0.003             |
| Before or after COVID-19 vs None                   | 2.39                                | 1.70 to 3.37   | < 0.001           | 1.69                                  | 1.11 to 2.58   | 0.02              |
| <b>Have a way to get food and medication</b>       |                                     |                | <b>&lt; 0.001</b> |                                       |                |                   |
| Yes vs No                                          | 2.77                                | 1.65 to 4.66   | <b>&lt; 0.001</b> |                                       |                |                   |
| <b>Feel safe and comfortable in home</b>           |                                     |                | <b>&lt; 0.001</b> |                                       |                |                   |
| Sometimes vs Never                                 | 0.56                                | 0.20 to 1.56   | 0.27              |                                       |                |                   |
| Always vs Never                                    | 0.12                                | 0.05 to 0.32   | < 0.001           |                                       |                |                   |
| <b>Have people to count on</b>                     |                                     |                | <b>&lt; 0.001</b> |                                       |                |                   |
| Sometimes vs Never                                 | 0.54                                | 0.31 to 0.96   | 0.04              |                                       |                |                   |
| Always vs Never                                    | 0.27                                | 0.16 to 0.44   | < 0.001           |                                       |                |                   |
| <b>Can get help if needed</b>                      |                                     |                | <b>&lt; 0.001</b> |                                       |                |                   |
| Sometimes vs Never                                 | 0.53                                | 0.32 to 0.87   | 0.01              |                                       |                |                   |
| Always vs Never                                    | 0.23                                | 0.15 to 0.36   | < 0.001           |                                       |                |                   |

**Table 3.** Parameter estimates, odds ratio (OR), 95% confidence interval (95% CI) and P-value for the longitudinal multivariable generalized estimating equation model for self-report mood scale score of 5+ over four study waves.

| Parameter                                 | Estimate | 95% CI |        | Z      | P-value | Adjusted OR | 95% CI |       |
|-------------------------------------------|----------|--------|--------|--------|---------|-------------|--------|-------|
| <b>Intercept</b>                          | -2.761   | -3.126 | -2.398 | -14.87 | < 0.001 |             |        |       |
| <b>Age group (ref=18-24)</b>              |          |        |        |        |         |             |        |       |
| 25-34                                     | 0.12     | -0.20  | 0.45   | 0.74   | 0.45    | 1.13        | 0.82   | 1.56  |
| 35-44                                     | -0.23    | -0.58  | 0.12   | -1.28  | 0.20    | 0.79        | 0.56   | 1.13  |
| 45-64                                     | -0.25    | -0.54  | 0.03   | -1.73  | 0.08    | 0.78        | 0.58   | 1.03  |
| 65+                                       | -0.79    | -1.07  | -0.51  | -5.56  | < 0.001 | 0.45        | 0.34   | 0.60  |
| <b>Province (ref=Quebec)</b>              |          |        |        |        |         |             |        |       |
| Others                                    | 0.26     | 0.05   | 0.46   | 2.46   | 0.01    | 1.30        | 1.05   | 1.59  |
| <b>Health Status (ref=no concerns)</b>    |          |        |        |        |         |             |        |       |
| Overwhelmed by one's health needs         | 1.33     | 1.05   | 1.62   | 9.16   | < 0.001 | 3.80        | 2.85   | 5.05  |
| <b>Loneliness (ref=not lonely)</b>        |          |        |        |        |         |             |        |       |
| Lonely only in specific situations        | 0.74     | 0.45   | 1.03   | 4.94   | < 0.001 | 2.09        | 1.56   | 2.80  |
| Lonely occasionally                       | 1.39     | 1.14   | 1.64   | 10.83  | < 0.001 | 4.02        | 3.13   | 5.17  |
| Lonely daily                              | 2.96     | 2.69   | 3.22   | 22.11  | < 0.001 | 19.29       | 14.84  | 25.07 |
| <b>Financial status (ref=no worries)</b>  |          |        |        |        |         |             |        |       |
| Financial worry before and after COVID-19 | 0.69     | 0.48   | 0.89   | 6.56   | < 0.001 | 2.00        | 1.62   | 2.45  |
| Financial worry before or after COVID-19  | 0.62     | 0.38   | 0.86   | 5.09   | < 0.001 | 1.86        | 1.46   | 2.35  |
| <b>Study Wave (ref=Survey 1)</b>          |          |        |        |        |         |             |        |       |
| Survey 2                                  | -0.23    | -0.46  | 0.01   | -1.89  | 0.06    | 0.80        | 0.63   | 1.01  |
| Survey 3                                  | -0.27    | -0.52  | -0.03  | -2.20  | 0.03    | 0.76        | 0.60   | 0.97  |
| Survey 4                                  | -0.32    | -0.57  | -0.07  | -2.52  | 0.01    | 0.72        | 0.56   | 0.93  |

## FIGURES

Figure 1. Longitudinal trends in percentage of participants with 5+ score on the self-reported mood scale by study survey.

Figure 1.

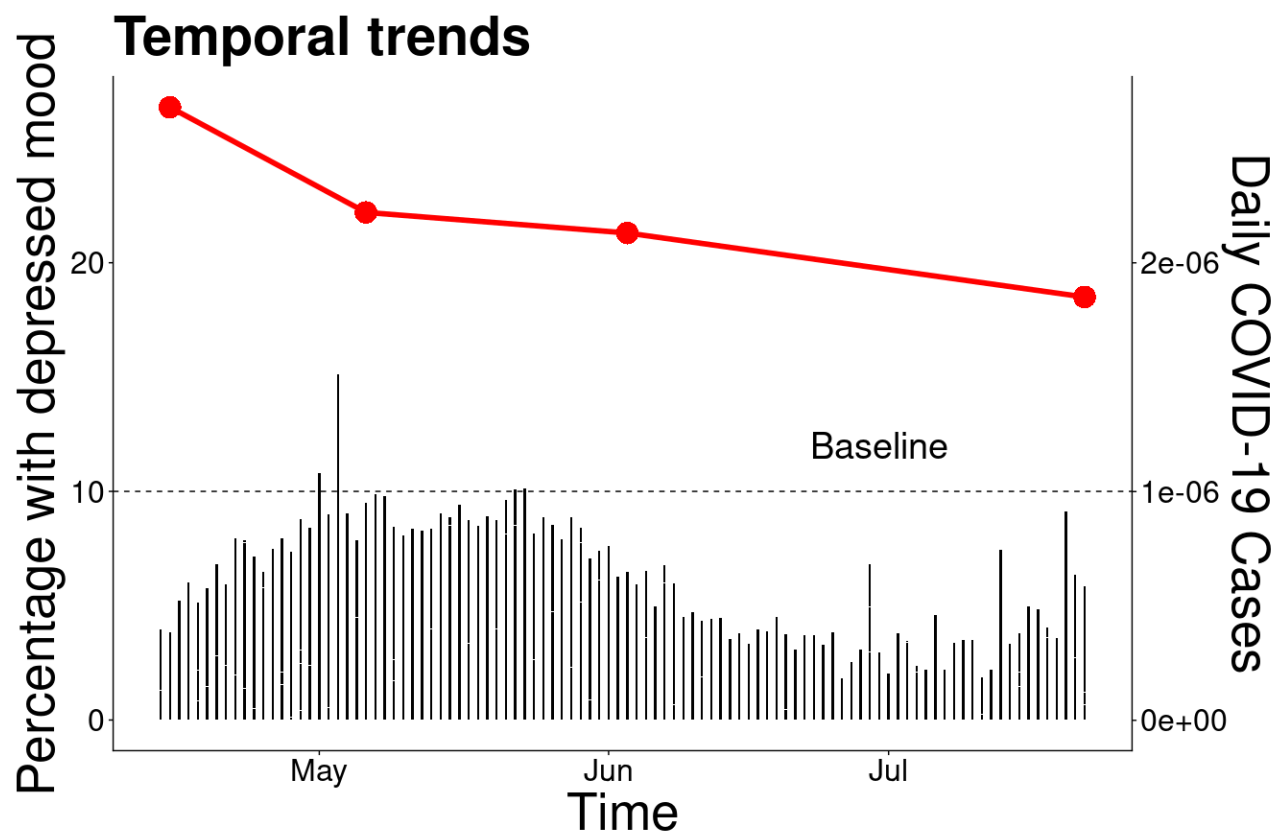

Source: https://medrxiv.org/content/10.1101/2021.01.21.20245795v1.full.pdf
